1 **A geometric approach to human stress based on**  
2 **stress-related surrogate measures**

3 Petr Kloucek<sup>1</sup>, Armin von Gunten<sup>2</sup>

4 <sup>1</sup> Service of Old-Age Psychiatry, Department of Psychiatry, Lausanne University Hospital, Route de Cery, CH-1008, Lausanne, Switzerland;

5 e-mail: petr.kloucek@iCloud.com

6 <sup>2</sup> Service of Old-Age Psychiatry, Department of Psychiatry, Lausanne University Hospital, Route de Cery, CH-1008, Lausanne, Switzerland;

7 e-mail: Armin.Von-Gunten@chuv.ch

8 **Keywords:** Stress, behavioural complexity, physiological and behavioural surrogate data, self-similar normally  
9 distributed processes, non-integer Hausdorff-Besicovitch dimension, Hurst index, behavioural entropy.

10 **Abstract**

11 We present a predictive Geometric Stress Index (pGSI) and its relation to behavioural Entropy  
12 ( $bE$ ).  $bE$  is a measure of the complexity of an organism's reactivity to stressors yielding patterns  
13 based on different behavioural and physiological variables selected as surrogate markers of stress  
14 (SMS). We present a relationship between pGSI and  $bE$  in terms of a power law model. This  
15 nonlinear relationship describes congruences in complexity derived from analyses of observable  
16 and measurable SMS patterns interpreted as stress. The adjective geometric refers to  
17 subdivision(s) of the domain derived from two SMS (heart rate variability and steps frequency)  
18 with respect to a positive/negative binary perceptron based on a third SMS (blood oxygenation).  
19 The presented power law allows for both quantitative and qualitative evaluations of the  
20 consequences of stress measured by pGSI. In particular, we show that elevated stress levels in  
21 terms of pGSI leads to a decrease of the  $bE$  of the blood oxygenation as a model of SMS.

---

Corresponding author: Petr Kloucek, petr.kloucek@iCloud.com

## INTRODUCTION

22 This paper is an extension of our previous spectral theory of human stress, [Kloucek and von](#)  
23 [Gunten \(2018\)](#), providing a posteriori analysis of stress experienced by a human subject. Here, we  
24 explore the possibility to predict mental and physical stress based on a finite number of  
25 measurements using various types of artificial intelligence.

26 Continuous psychological stress monitoring in daily life is important. There are two conventional  
27 methods to measure psychological stress, i.e., self-report and body fluid analysis. The self-report  
28 method is hard put to monitor human stress consistently due to the lack of standards for stress  
29 status. The body fluid analysis is invasive and cannot measure stress continuously.

30 We intend to illustrate the potential of complexity analytics using physiological and behavioural  
31 data of a few normal subjects. More specifically, we decided to use heart frequency variability  
32 (HFV) and step frequency (SF) for the analyses as predictor variables of the oxygen saturation in  
33 the blood ( $SO_2$ ) as a binary perceptron approximated by peripheral blood oxygenation ( $S_pO_2$ ).  
34 These variables will serve as surrogate markers of stress (SMS). We compute the heart frequency  
35 variability from HF.

36 The purpose of this communication is fourfold.

37 First, we introduce the predictive Geometric Stress Index using HF, SF and  $SO_2$ . Complexity  
38 plays an important role in the objective indexing of SMS patterns [Kloucek and von Gunten](#)  
39 [\(2016\)](#), [Kloucek and von Gunten \(2018\)](#).

40 We use the adjective “geometric” to indicate that we compute separation curve(s) in the  $(0, 1)^2$   
41 complexity space given the complexity projections of  $HFV \times SF$  based on the respective values of  
42 the perceptron separating normoxemia domain(s) from hypoxemia domain(s).

43 Second, we re-define  $bE$  we have proposed elsewhere [Kloucek, Zakharov, and von Gunten \(2016\)](#).  
44  $bE$  measures behavioural and/or physiological reactivity distribution of a sequence of different  
45 events represented by the complexity of a single pattern corresponding to, e.g., HFV. The concept  
46 resides with the assumption that  $bE$  should not be evenly, or nearly so, distributed in time. This

47 approach is similar to the entropy concept in the physics measuring uneven distributions of energy  
48 among atoms. Increasing non-uniform energy distribution increases the entropy of "a non-organic  
49 system" while keeping its complexity high. Similar argumentation can be applied to living  
50 organisms [Schrödinger \(1944\)](#).

51 Third, we introduce the predictive Stress Resistance Index (pSRI) that is meant to quantify  
52 human resistance to various forms of stress. pSRI is based on perceptron values and their  
53 distances to the separation hyperplanes yielded by analyses of time-series of SMS.

54 Fourth, we propose a power law model linking pGSI with behavioral entropy applying it to  
55 time-series of SMS. We strive to predict stress in terms of pGSI in human subjects as measured  
56 through the evolution of complexity patterns, using a power law relating pGSI and  $bE(.)$ .

57 In short, we present a proof of concept study showing that complexity analysis of HF and SF and  
58 oxygen saturation can be used as SMS to predict human stress.

## METHODS

### 59 *Subjects*

60 Eight subjects between thirty-five and fifty-five years, four men and four women agreed on  
61 carrying a Biovotion's VSM (vital signes monitor) during normal work days including daily  
62 routines and sleep.

### 63 *Quantities measured*

- 64     ▪ Heart Frequency  
65         was estimated by means of a motion-compensating algorithm from pulse-induced variations of  
66         optical reflection from the skin under the sensor.
- 67     ▪ SF  
68         Movement corresponds to the instantaneous whole-body activity of a human subject. The  
69         measurements were performed with a 3-axis accelerometer. The indicator is given by energy

70 variations of low-passed filtered differentials of accelerometer measurements. SF was  
71 determined as the inverse of speed of movement.

72 ▪ Blood Oxygenation (SO<sub>2</sub>) was measured using reflected red and infrared light supported by  
73 motion-compensating algorithms to estimate the ratio of hemoglobin molecules in arterial  
74 blood.

75 Skin perfusion and temperature were further measures, not used for the purpose of this  
76 study.

### 77 *Quantities used for the purpose of the study*

78 We used HFV and SF for the analyses as predictor variables and SO<sub>2</sub> as a binary perceptron. The  
79 choice of HFV and SF is meant to allow distinguishing increased physical activity (e.g. sport  
80 activity leading to congruent increase of HF and SF) from mental stress leading to incongruent  
81 HF increase and SF decrease. We felt the limitation to two variables was adequate mainly for two  
82 reasons. First, HF (usually its variability) is often used as an indicator of stress, and SF is a  
83 reasonable indicator for the intensity of physical activity. Second, we felt the use of only few  
84 variables was appropriate for the sake of simplicity for this proof of concept. With the purpose to  
85 introduce an element of prediction, we assume that the choice of SO<sub>2</sub> as a binary perceptron is  
86 adequate. Preliminary analysis revealed that SO<sub>2</sub> as measured over time showed a great  
87 variability lending itself for the purpose of complexity analyses. Furthermore, the term hypoxemia  
88 as used in this paper refers to lower levels of oxygenation relative to the mean oxygen saturation  
89 of its complexity. A further reason for the choice of the three SMS is that each of them has much  
90 bigger variance over time compared to the rest of the sensory data we had at our disposal (cf. also  
91 later).

### 92 *Analyses*

93 We use Logical Regression (LR) [Hosmer, Lemeshow, and Sturdivant \(2013\)](#), [Howell \(2013\)](#), and  
94 Artificial Neural Networks (ANN) [Kruse \(2013\)](#), [MacKay \(2003\)](#), [Ripley \(1996\)](#), to obtain  
95 separation relative to normoxemia– hypoxemia boundaries in the  $H(HFV) \times H(SF)$  complexity

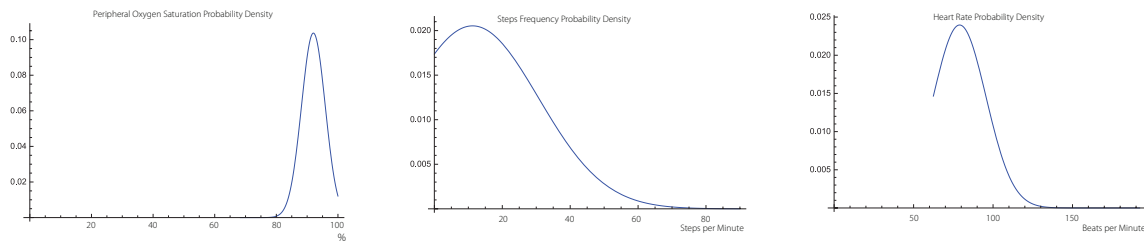

102 Figure 1. Typical probability densities of the stress indicatrix pertaining to Subject 4. The densities are computed using 1,828 data  
103 points representing 54,850 seconds at 30 stroboscopic resolution using histograms based on 60 bins. All three densities are very close to  
104 normal distribution and possess approximate self-similarity.

96 space based on  $\text{SO}_2$  perceptron binary values.  $H(\cdot)$  denotes the Hurst exponent of the enclosed  
97 SMS, Mandelbrot and Van Ness (1968). The complexity product space is based on the  
98 self-similarity scaling of normally distributed SMS time-series that can be recorded over a  
99 meso-temporal time span MörTERS and Peres (2010). A typical distribution is shown at Figure 1.  
100 Complexity expressed in terms of the Hurst exponent is closely related to the  
101 Hausdorff-Besicovitch dimension.

### 105 $\text{SO}_2$ as a Binary Perceptron

106 The crucial choice is to select which surrogate data to consider. We choose the HFV complexity  
107 and SF complexity as the two  $x$  and  $y$  axes, which express physiological (HFV) and behavioural  
108 (SF) parameters.

109 We consider the pGSI to depend on three surrogate time discrete processes, i.e. HFV, SF, and  
110  $\text{S}_p\text{O}_2$ . The reason for the choice is that each of them have about ten to hundred times bigger  
111 variance compared to the rest of the sensory data we measured (cf. Section Variance of Some  
112 Sensory Human Data).

113 Furthermore, we chose SMS with high variance that also had some degree of correlation. Table 4,  
114 Table 6 and Table 7 (cf. Annex indicating correlation among HF, SF, and  $\text{S}_p\text{O}_2$ ). The tables  
115 indicate that  $\text{SO}_2$  is negatively correlated with both HF and SF. The correlation tables also  
116 highlight the differences among different subjects.

117 Subsequently, we chose the complexity of the approximation of  $\text{SO}_2$  as the third surrogate data,  
118  $\mathcal{Z}$ . We turn this variable into a binary perceptron using formula (1). The perceptron provides a  
119 planar separation, given by smooth curve(s), of  $H(\text{HFV})$  and  $H(\text{SF})$ . We lean on the following  
120 argument, tangentially supported by Snyder and Weathers (1977), Nikinmaa (1992), Nikinmaa  
121 and Mattsoff (1992), Nikinmaa and Jensen (1992), Chien (1970), leading to the choice of  $\text{S}_p\text{O}_2$  as  
122 the binary perceptron.

123 A further reason for the choice of the  $\text{S}_p\text{O}_2$  as binary perceptron is that stress-hormones-induced  
124 changes occur that include the  $\text{CO}_2/p\text{H}$ -dependent decrease of the affinity of oxygen to  
125 hemoglobin due to the Bohr effect Riggs (1988), thus increasing the oxygenation potential in the  
126 tissues.

## RESULTS

### 127 *The Predictive Geometric Stress Index (pGSI)*

128 We propose a view of some of the acquired SMS leading to the definition of pGSI.

Consider three time-discrete vectors  $\mathcal{X} = \{x(t_i)\}_{i=1}^n$ ,  $\mathcal{Y} = \{y(t_i)\}_{i=1}^n$ ,  $n \gg 1$ , and  $\mathcal{Z} = \{z(t_i)\}_{i=1}^n$   
corresponding to three different sets of data representing HFV, SF and  $\text{SO}_2$ . These quantities  
have different physical units and different ranges. We remove these discrepancies by projecting  
segmented sub-vectors on the complexity space provided by the Hurst exponent Mandelbrot and  
Van Ness (1968) or, equivalently, by the Hausdorff-Besicovitch dimension Peitgen, Jügen, and  
Saupe (1992). Using time equidistant coarse-grained segmentation  $\{t_m\}_{m=1}^k$ , we compute

$$H : (x(t_m), x(t_{m+1})) \mapsto (0, 1], \quad \left| \bigcup_{m=1}^{k-1} (t_m, t_{m+1}) \right| = |t_k - t_1|, \quad k > 1. \quad (1)$$

129 We compute such projections for all three quantities yielding coarse-grained complexity images of  
130 the three time-discrete vectors. We denote the new vectors by  $H(\mathcal{X})$ ,  $H(\mathcal{Y})$  and  $H(\mathcal{Z})$ , respectively.  
131 We refer to the triple  $(H(\mathcal{X}), H(\mathcal{Y}), H(\mathcal{Z}))$  as stress indicatrix. This projection, contained in  $(0, 1]^3$ ,  
132 is not invertible for we discard micro-structural information contained in the originating  
133 time-series.

Further, we construct a binary perceptron  $\{\gamma\}_{m=1}^k$  mapping  $H(\mathcal{Z}) \mapsto \{-1, 1\}$  by

$$\gamma_m \stackrel{\text{def}}{=} \text{sign}(H((z(t_m), z(t_{m+1}))) - \mathbb{E}[H(\mathcal{Z})]), \quad m = 1, \dots, k, \quad (2)$$

134 where  $\mathbb{E}[\cdot]$  represents the mean of the enclosed quantity.

135 Considering the triples  $\{H(\mathcal{X})_m, H(\mathcal{Y})_m, \gamma_m\}_{m=1}^k \in (0, 1)^2 \times \{-1, 1\}$  we solve an optimization problem  
 136 providing “optimal”, possibly closed, curve(s) defining subdomains  $\Omega_j^+$  and  $\Omega_j^-$ ,  $i, j \in \mathbb{N}$ , of  $(0, 1)^2$   
 137 such that  $\bigcup_{i>1} (\Omega_i^+) \cup \bigcup_{j>1} (\Omega_j^-) = (\min(H(\text{HFV})), \max(H(\text{HFV}))) \times (\min(H(\text{SF})), \max(H(\text{SF})))$ . The  
 138 respective subdomains are convex hulls separating points  $\{H(\mathcal{X})_m, H(\mathcal{Y})_m\}$  with  $\gamma_m = 1$  from the  
 139 points with  $\gamma_m = -1$ . The optimization yields the smallest number of these subdomains with the  
 140 largest area at the expense of allowing a small number of opposite signs to intermix, i.e., some  
 141 points with  $\gamma_m = -1$  can appear in some  $\Omega_i^+$ . We solve this optimization problem using a  
 142 combination ANN and LR. The optimization step yields a stress prediction diagram based on the  
 143 complexity of the acquired SMS using geometric extrapolation that yields planar separation by a  
 144  $\text{SO}_2$  binary perceptron.

Finally, we define pGSI, denoted  $\tau$ , by

$$\tau(H(\mathcal{X}), H(\mathcal{Y}); \gamma) \stackrel{\text{def}}{=} \frac{\text{meas}\left(\bigcup_{j \geq 1} \Omega_j^+\right)}{\text{meas}(\Omega)} \in [0, 1]. \quad (3)$$

#### 145 **pGSI Neutrality Baseline**

We consider  $\tau(\cdot, \cdot; \cdot) = \frac{1}{2}$  as the baseline. This approach is justified by the following observation.

Let the underlining discrete time-series  $\mathcal{X}$ ,  $\mathcal{Y}$  and  $\mathcal{Z}$  be normally distributed and self-similar.

Then it is plausible to assume that

$$\text{meas}\left(\bigcup_{j>1} \Omega_j^-\right) = \text{meas}\left(\bigcup_{i>1} \Omega_i^+\right) \quad \text{iff} \quad \text{card}(\{\gamma_j = -1 \mid j > 1\}) = \text{card}(\{\gamma_j = 1 \mid j > 1\}), \quad (4)$$

as  $i, j \rightarrow +\infty$ .

146 The normality assumptions are true in our computations. Normality distribution accompanied by  
 147 self-similarity of the chosen surrogate markers for stress is fundamental to characterize the

148 complexity of SMS. The examples shown in Figure 1 are computed using a histogram map with  
 149 high resolution bins.

150 The equality represents the neutral state for it equates distribution of complexities of the  
 151 surrogate data. The geometry contains more information though. The  $HFV \times SF$  complexity  
 152 space can be divided into four subregions reflecting complexity covariance and contra-variance  
 153 with respect to higher or lower than expected individual  $S_pO_2$ , (c.f., Figure 2). The two covariant  
 154 regions, the lower-left and upper-right quadrants, share the same short/long dynamical memories  
 155 as well as negative/positive autocorrelation of either complexity of HF and SF time-series. The  
 156 other two quadrants have opposite characterizations. Consider the upper-left quadrant. While the  
 157  $x$ -axis, representing the complexity of SF, would indicate complex SMS pattern, the HFV axis  
 158 indicate a more regular pattern. These readings combined with “below-the-mean” personal  $SO_2$   
 159 can possibly indicate higher physical activity. Furthermore, the lower-right quadrant may indicate  
 160 mental stress when the complexity of HFV and SF are reversed while the complexity of  $SO_2$  is still  
 161 low.

### 168 ***Predictive Stress Resistance Index (pSRI)***

169 The predictive Stress Resistance Index (pRSI) is a further refinement of the pGSI concept. It is  
 170 based on the idea that the more data points are away from the hypoxemia – nonrmhypoxemia  
 171 complexity boundary the more resistance to stress a subject will be.

172 The resistance index,  $\theta$ , is defined as follows. Let

$$m^+ \stackrel{\text{def}}{=} \text{card} \left\{ \left\{ (H(HFV)_j, H(SF)_j) \in \bigcup_{i>1} \Omega_i^+ \right\} \right\}. \quad (5)$$

173 pSRI is then given by, c.f., the left drawing at Figure 5

$$\theta \stackrel{\text{def}}{=} \frac{1}{m^+} \sum_{j=1}^{m^+} \text{dist} \left( \left( \{H(HFV)_j, H(SF)_j\} \in \bigcup_{i>1} \Omega_i^+ \right), \bigcup_{i>1} \partial\Omega_i^- \right). \quad (6)$$

174 The pGSI is a global index. It can be achieved by uncountably many different configurations of  
 175 the stress perceptrons. The predictive personalised stress diagram (pPSD) indicates desirable



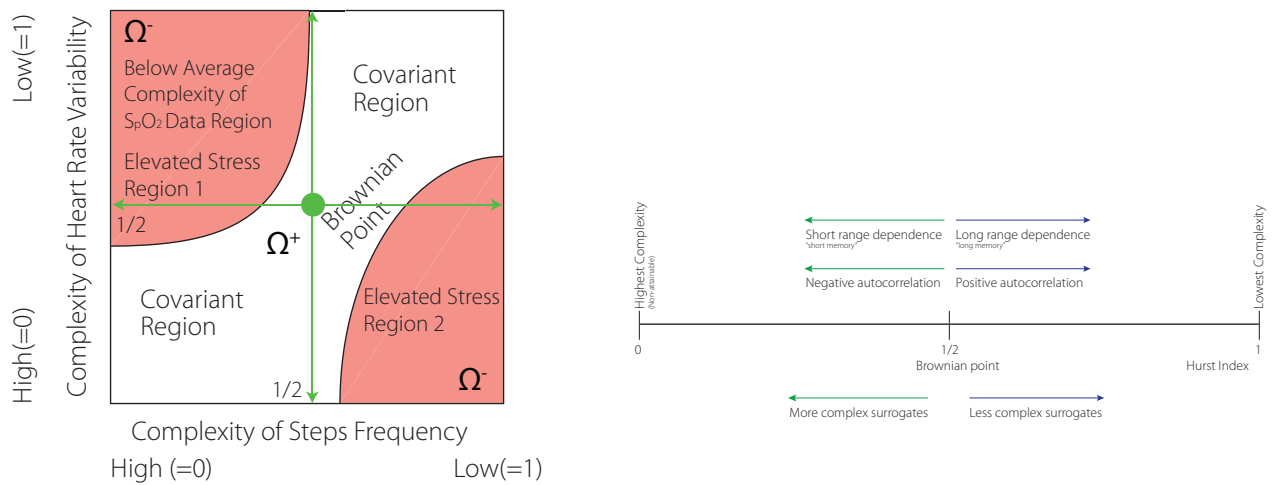

162 Figure 2. Left: Example of a segmentation of the complexity of HFV  $\times$  SF space using  $SO_2$  as a binary perceptron.  $SO_2$  low complexity  
 163 level, indicating possibly hypoxemia, accompanies incongruent complexity of HFV  $\times$  SF combinations. Projecting the low levels of  $S_pO_2$   
 164 onto the HFV  $\times$  SF two-dimensional space identifies regions with undesirable HFV/SF combinations. Region 1 corresponds to physical  
 165 stress (high SF): low  $SO_2$  complexity, high SF complexity, low HFV complexity, i.e., low  $S_pO_2$  relative to individual normhypoxemia.  
 166 Region 2 corresponds to mental stress: low  $S_pO_2$  complexity, low SF complexity, high HFV complexity, i.e., low  $S_pO_2$  relative to individual  
 167 normoxemia despite low motion levels. Right: Interpretation of the complexity indices.

176 combinations of HRV/SF complexity configurations with respect to a higher level of  $SO_2$ . The red  
 177 dots correspond to  $\gamma = -1$ , the green dots correspond to  $\gamma = 1$ , i.e., to normoxemia  
 178 perceptrons.

179 Comparing pGSI and pRSI for healthy Subject 6 (data are available upon request from authors)  
 180 we conclude, as an example of the application of the pGSI/pRSI combination, that while pGSI of  
 181 the Subject 6 ranks fourth, its pRSI is much lower with respect to the control group. This  
 182 indicates rather medium to low ability to deal with the stress, at least if our assumptions are  
 183 correct (cf. Figure 6 compared to Figure 7).

#### 184 **Entropy of Behavioural Complexity**

Consider a time discrete process  $\mathcal{X} = \{X(t_i), i = 1, \dots, m\}$ , with its complexity given by the Hurst  
 exponent,  $H(X(t_i))$ , computed using granulation of an underlying time-series over a uniform

segmentation  $(t_i, t_{i+1})$  of  $(0, T)$ . The Entropy of Behavioural Complexity Kloucek et al. (2016), is defined by

$$b\mathbb{E}(H(\mathcal{X}_m)) \stackrel{\text{def}}{=} \sum_{i=1}^m \|\|H(X(t_i))\|\| \text{sign}(H(X(t_m)) - H(X(t_1))). \quad (7)$$

185 The Hurst exponent,  $H$ , denotes the complexity index of acquired normally distributed SMS,  $\|\|$   
 186 denotes a jump of an enclosed quantity, i.e.,  $\|\|H(X(t_i))\|\| \stackrel{\text{def}}{=} H(X(t_i)) - H(X(t_{i+1}))$ ,  $t_i$  are time  
 187 equidistant points at which the function  $h : t \mapsto H(t)$  has a finite jump. The signum of the  
 188 difference between the complexities of previous and subsequent states indicate if the behaviours  
 189 tend to a lower or higher complexity. The negative sign indicates the tendency towards higher  
 190 complexity, the positive sign indicates the opposite.

We adopt the following localized time discrete notion of the entropy of behavioral complexity  
 (7)

$$b\mathbb{E}(H(\mathcal{X}_m)) \stackrel{\text{def}}{=} \sum_{i=1}^{m-1} \|\|H(X(t_{i+1}))\|\| \text{sign}(H(X(t_{i+1})) - H(X(t_i))). \quad (8)$$

191 The above definition of the localized entropy is a sum of signed strengths of the complexity  
 192 discontinuities.

193 The definition of  $b\mathbb{E}$ , (8), accounts also for the history of attaining certain complexity states unlike  
 194 its definition (7) that accounts only for the sign of the difference between initial and terminal  
 195 state.

196 The idea behind the (8) definition is that  $b\mathbb{E}$  should be negative if the system evolves, with some  
 197 probability, to a state with higher complexity and positive when the system evolves towards a  
 198 lesser complexity state. Let us consider the example presented in Figure ?? using synthetic data  
 199 generated by normally distributed random numbers. The red piece-wise constant function is  
 200 represented by  $b\mathbb{E} = 2.15$  while the blue, decreasing function,  $b\mathbb{E} = -2.95$ .

### 201 ***pGSI relation to $b\mathbb{E}$***

We propose a power law model relating pGSI to respective  $b\mathbb{E}(\cdot)$  having the form

$$\alpha \text{pGSI}(H(\mathcal{X}), H(\mathcal{Y}); \gamma)^\beta \sim b\mathbb{E}(H(\mathcal{V})), \quad \alpha, \beta \in \mathbb{R}, \quad (9)$$

202 where  $\mathcal{X}$ ,  $\mathcal{Y}$  represent HFV and SF time-series. The third quantity,  $\mathcal{Z}$ , is represented by  $\text{SO}_2$  as  
203 the binary perceptron  $\gamma$  given by (2). The time-series  $\mathcal{V}$  represents the remaining quantities.

We identify the power law quantities,  $\alpha \in \mathbb{R}$  and  $\beta \in \mathbb{R}$ , by solving the following non-linear problem

$$(\alpha_j, \beta_j) = \underset{\{a, b\} \in \mathbb{R}^2}{\text{Argmin}} \left\{ \left| a \tau(H(\mathcal{X}_j), H(\mathcal{Y}_j); \gamma_j)^b - b \mathbb{E}(\mathcal{V}_j) \right|^2, \{a, b\} \in \mathbb{R}^2 \right\}, j = 1, \dots, \# \text{ of subjects}, \quad (10)$$

204  $\tau(H(\mathcal{X}), H(\mathcal{Y}); \gamma)$  is given by (3).

205 The different power laws relating pGSI to  $bE$  of different patterns might explain the relation  
206 between stress and complexity tendencies of SMS time-series. We include the following example as  
207 an illustration. Consider  $\mathcal{X}$  representing HF,  $\mathcal{Y}$  SF complexities and  $\mathcal{Z}$   $\text{SO}_2$  in the form of its  
208 binary perceptron  $\gamma$ . The computational results indicate, e.g., that

$$0.1 \tau(H(\mathcal{X}), H(\mathcal{Y}); \gamma)^{0.6} \approx b \mathbb{E}(H(\mathcal{X})), \quad (11)$$

209 solving (10).

210 Scaling laws are shown in Table 2 and visualised by Figure 3.

### 211 **Power Laws**

212 Scaling laws are shown in Table 2 and visualised by Figure 3.

213 Figure 3 shows  $b\mathbb{E}(\cdot)$  of HFV,  $\text{SO}_2$  and SF as a function of pGSI.

216 The curves shown at Figure 3 indicate that increased level of stress leads to increased  $b\mathbb{E}$  of HFV,  
217 Perfusion and Step frequency. The only exception to this is the complexity of  $\text{S}_p\text{O}_2$ .

### 218 **Correlation of Heart Rate, Steps Frequency and Blood Oxygenation**

219 We use simple Pearson product-moment correlation coefficient Pearson (1895), to estimate SMS  
220 dependency.

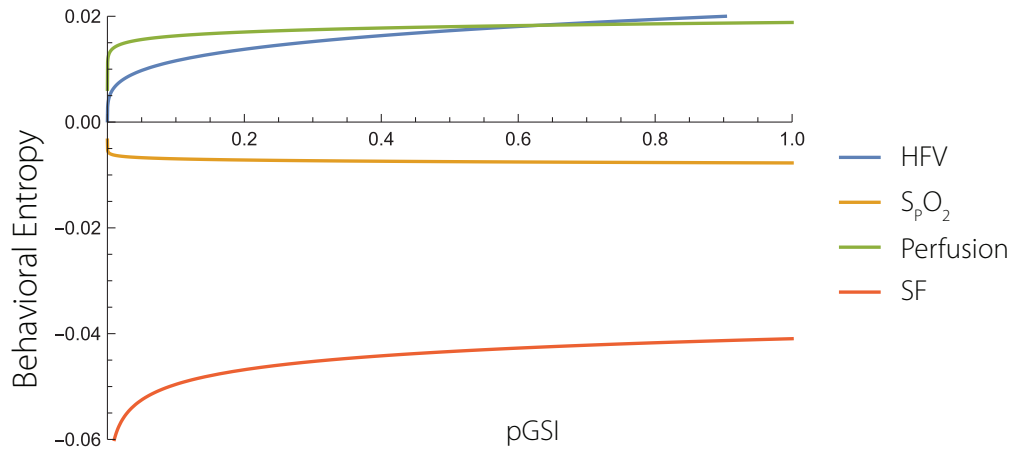

214 Figure 3.  $bE$  power laws. The figure is based on eight healthy subjects. The plot shows how the complexity of different SMS behave  
215 with the increasing stress index, pGSI. The curves show that complexity of all SMS increases except for the complexity of the  $SO_2$ .

221 The data summarised by Table 4, Table 6 and Table 7 show examples of correlations among  
222 different sensory quantities of three different subjects. The first two tables correspond to healthy  
223 men and women, respectively, the third table corresponds to a female runner, during a typical  
224 working day including night/sleep readings. The first two tables show nearly equal negative  
225 correlation among HF/ $SO_2$ , SF/ $SO_2$  while that third table indicates positive HF/ $S_pO_2$  and nearly  
226 none SF/ $SO_2$  correlations.

### 227 **Mathematical Technicalities**

228 We address in this section some subtle points related to a construction of the personal relative  
229 hypoxemia – normoxemia domain partitions in the  $H(HFV) \times H(SF) \times SO_2$  space, on which we  
230 can perform integration in order to compute domains areas to be able to compute pGSI, we can  
231 identify domains separation curves, we can compute distances to the separation boundaries, and  
232 we can decide which of the acquired SMS belong to which subdomain to be able to compute  
233 pSRI.

234 We use both ANN Cain (2017), Schalkoff (1997) and LR Harrell (2001), Everitt (2009), Rossi  
235 (2010), Bolstad (2010), in parallel to process the complexity indices of the acquired SMS. The

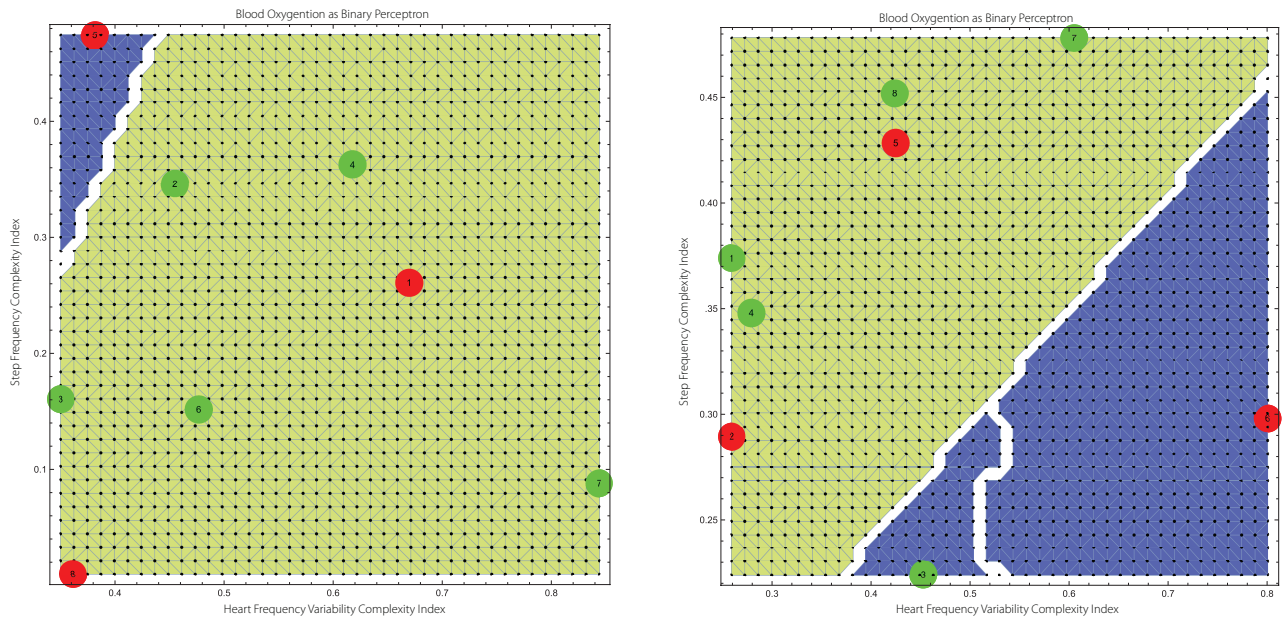

250 Figure 4. The Delaunay mesh and its separation to normoxemia and hypoxemia subdomains of Subjects 4 and 6, respectively, used to  
251 compute both pGSI and pSRI. The predictive component of the analysis is associated with the assumption that the boundaries  $\Gamma_i$ ,  $i = 1, 2$ ,  
252 should remain stable while the complexity data points can move around the effective complexity domain  $H(\text{HFV}) \times H(\text{SF})$ .

236 reason we use two different techniques is to deal more effectively with small data sets. In the next  
237 step, we apply three different techniques to identify clusters of points forming relative hypoxemia  
238 and normoxemia subdomains, i.e., Bray-Curtis Dissimilarity measure/distance (a non-Euclidian  
239 distance) Greenacre (2017), Cutsem (1994), Krebs (1999), Chebyshev Distance Cantrell (2000),  
240 and Normalized Squared Euclidian Distance. We use Calinski-Harabasz cluster criterion, Caliński  
241 and Harabasz (1974). We select then the result with the least number of clusters. We then  
242 compute convexification of the respective clusters as a coarse-grained partitioning of the effective  
243 domain  $H(\text{HFV}) \times H(\text{SF}) \subset (0, 1)^2$ . We thus allow some hypoxemia points to belong to  
244 normoxemia subdomains and vice-versa. These steps fundamentally simplify subsequent  
245 construction of Delaunay triangulations Lee and Schachter (1980), Field (1988), based on the  
246 identified points in the complexity effective domain of the respective subdomains. Typically, we  
247 use  $60 \times 60$  mesh points. Lastly, we disconnect the respective subdomains by small layers  
248 improving the quality of the triangulation by avoiding edges of the opposite classification. An  
249 example of the outcome of these procedures is shown in Figure 4.

## 253 ***Results Pertaining to Human Stress and Stress Resistance***

254 Below we report a number of findings applying our theory to real individuals. The density plot on  
255 the right at Figure 5 shows an example indicating the personal hypoxemia(blue) –  
256 normoxemia(yellow) boundary between  $H(HFV)$  and  $H(SF)$  determined by non-linear  
257 optimization using the personal  $SO_2$  perceptron.

258 To interpret the density projection shown in Figure 5, consider two different scenarios. Focusing  
259 on the lower boundary of the normoxemia – hypoxemia domain, complexity of HFV, i.e.,  
260  $H(HFV) > 1/2$ , exhibits lower complexity compared to SF complexity,  $H(SF) < 1/2$ , with a ratio  
261 of approximately 1 : 3. The grey point at this boundary illustrates this scenario. The combination  
262 might represent physical activity of a trained and healthy subject.

263 The second scenario, represented by both  $H(HFV)$ ,  $H(SF)$  being below 1/2, shown by the grey dot  
264 at the upper boundary of the  $\gamma = 1$  subdomain, indicates that HFV and SF complexities  
265 approximately match. Consequently, the first scenario might correspond to a physical stress (high  
266 activity), while the second scenario corresponds to a mental stress represented by high complexity  
267 of HFV with lower complexity of SF.

268 Consider segment # 8 (24:00 - 03:00) shown at Figure 5 that corresponds to a period of sleep, in  
269 which higher complexity of HFV is accompanied by a near absence of SF complexity and a lower  
270  $SO_2$  complexity. Segment # 3 (15:00 - 17:00) is approximately opposite to segment # 8. The  
271 segment # 4 has all the characteristics of the first scenario, i.e. physical activity.

## 278 ***pGSI and pSRI***

279 The figure Figure 7 shows comparison between the two measures, pGSI and pSRI. Comparing  
280 pGSI and pRSI for Subject 6 we conclude, as an example of the application of pGSI/pRSI  
281 combination, that while pGSI of Subject 6 ranks fourth, its pRSI is much lower. According to our  
282 interpretation, this may indicate rather medium to low ability to deal with stress (c.f., Figure 6  
283 compared to Figure 7).

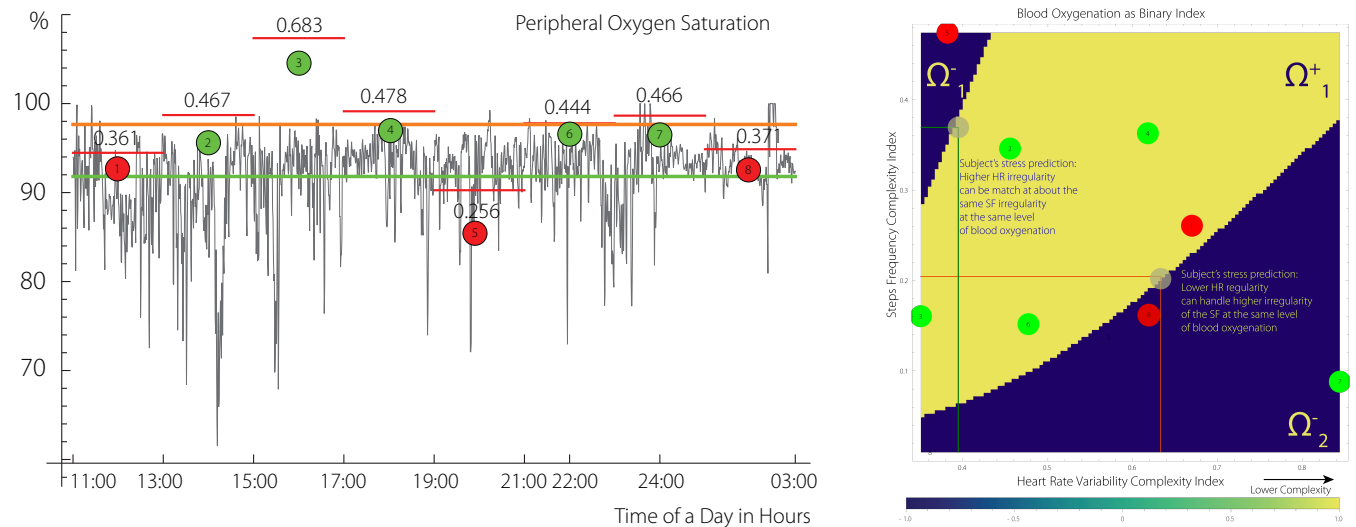

272 Figure 5. The left plot. Segmentation of  $SO_2$  and its projection on  $H(HFV) \times H(SF)$  space in the form of  $SO_2$  using ANN. The step-like  
 273 function indicates the value of the Hurst index for each segment. The right plot. The yellow color indicates  $SO_2$ -perceptron value  $\gamma = 1$ ,  
 274 given by (2),  $\Omega^+$ , i.e., normhypoxemia, blue colour indicates  $\gamma = -1$ ,  $\Omega_i^-$ ,  $i = 1, 2$ . The grey circles are positioned at the boundary of a  
 275 convex hull of certain number of points with  $\gamma = +1$ . The analyzed data correspond to a human subject encapsulating 15 hours of SMS  
 276 acquisition. Each segment contains about 225 data points. The green horizontal line indicates mean of  $SO_2$ , the orange represents the  
 277 mean of the complexity segments.

## DISCUSSION

288 The main idea behind our approach is to use three dimensional phase spaces to model human  
 289 stress. Our approach is based on the use of  $SO_2$  as the binary perceptron as well as HFV and SF  
 290 as surrogate markers for SMS.

291 The pGSI index separates high physical activity from what we interpret as mental stress. Our  
 292 analyses suggests that subjects can be distinguished regarding their overall SMS levels. Our  
 293 analysis also suggests that stress is not necessarily low during sleep. Both indices, i.e.,  $H(HFV)$   
 294 and  $H(SF)$  complexities correspond well with the HF and SF raw data. Low stress modes  
 295 typically exhibit a positive correlation between HF and  $S_pO_2$  while high stress modes have the  
 296 opposite impact.

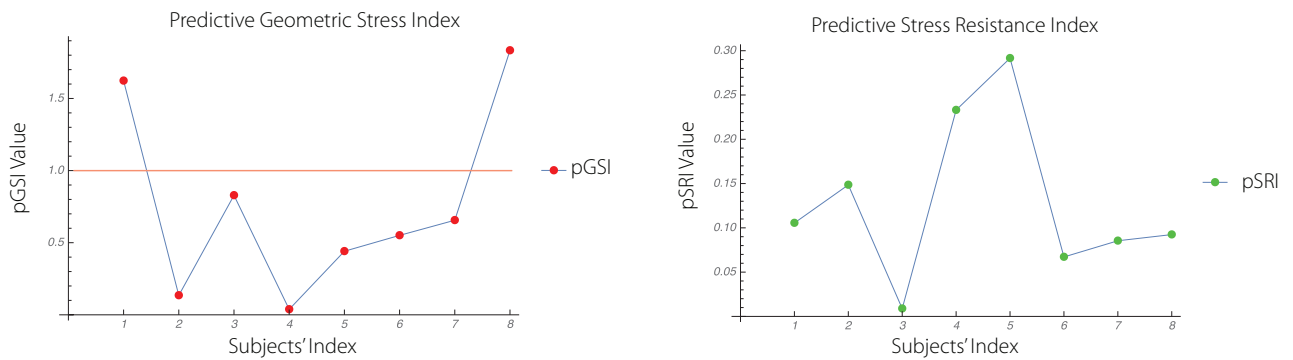

284 Figure 6. pGSIs (left) and pSRIs (right) of eight subjects. The orange horizontal separation line indicates distinction between lower  
 285 and higher pGSI (c.f. Section pGSI Neutrality Baseline). Comparison of Subjects # 4 and # 5 shows that pGSI and pSRI might be also  
 286 inversely related.

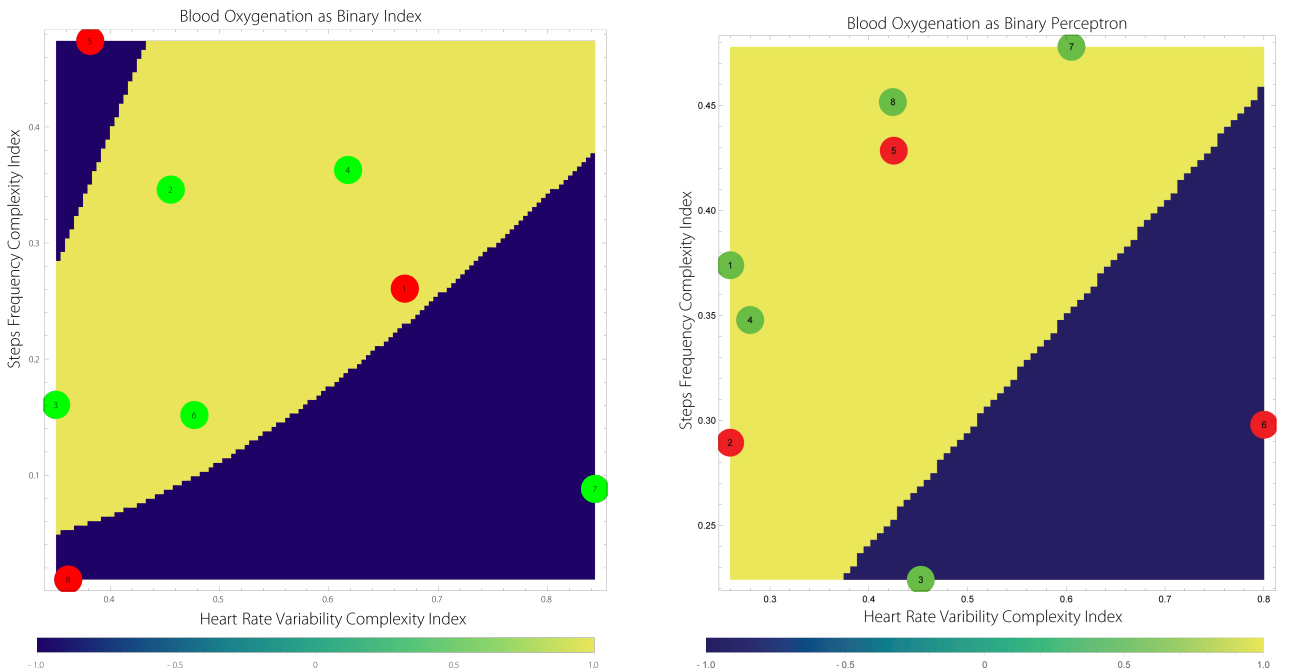

287 Figure 7. The predictive stress diagrams of Subjects 4 (left) and 6 (right) shown are generated using complexity and ANN, LR analyses.



297 The results obtained using the geometric indices are very similar to those based on spectral theory  
298 [Kloucek and von Gunten \(2018\)](#). However, the spectral concept is very different from the  
299 geometric one. The combination of HF and SF complexity changes over time predicts SO<sub>2</sub>  
300 complexity. Based on the variable congruency between HF and SF and the degree of SO<sub>2</sub>  
301 complexity, behavioural states can be extrapolated (or predicted) as either being in the normal,  
302 high-physical activity, or mental stress realm.

303 For our approach using SMS to achieve clinical relevance we will have to provide evidence of  
304 correlation of the results produced by our approach with those obtained through measurements of  
305 other indicators of mental stress status. Measuring subjective stress levels or dosing stress  
306 hormones in blood or saliva such as  $\alpha$ -amylase, cortisol or adrenalin, as well as others are  
307 necessary to prove clinical usefulness. However, none of the measures just mentioned above can be  
308 considered absolute gold standards of stress measurements. Subjective assessment of stress may  
309 be hampered in subjects with psychiatric disorders and vary widely among the normal population.  
310 Measures of hormones or neurotransmitters in blood or saliva are necessarily coarse-grained over  
311 time as they are invasive procedures and constitute no realistic approach in clinical settings. HF  
312 variability is sometimes used as another measure of stress and may be considered a gold standard  
313 for stress measures. Thus, the relationship between heart rate variability and salivary cortisol  
314 levels has been proven ([Alberdi et al., 2016](#)). However, the similarity of results of our spectral and  
315 geometric approach suggests our approach is promising.

316 The novelty of the proposed model of stress allows for prediction of building of a stress.

## ANNEXE

| Quantities | HfV         | Blood Oxygenation | Perfusion  | Skin Temperature | Relative Movement | Steps Frequency |
|------------|-------------|-------------------|------------|------------------|-------------------|-----------------|
| Subject 1  | 0.000187194 | -0.0247733        | 0.0146822  | -0.087012        | -0.214842         | -0.00867333     |
| Subject 2  | 0.00470825  | 0.0169768         | 0.0169838  | -0.00218787      | -0.026098         | -0.0206288      |
| Subject 3  | -0.00816192 | -0.112449         | -0.0693975 | -0.112396        | -0.0567872        | -0.0224971      |
| Subject 4  | -0.0439746  | 0.0014295         | -0.0884581 | -0.0545995       | -0.0105887        | -0.0358108      |
| Subject 5  | 0.07338     | -0.0185053        | 0.184398   | -0.223067        | -0.0205703        | -0.2314         |
| Subject 6  | 0.0235307   | -0.00451071       | 0.0556966  | 0.0344798        | -0.0328561        | 0.0111028       |
| Subject 7  | -0.0017095  | 0.0120759         | 0.0133848  | -0.0466192       | -0.0314652        | -0.0339552      |
| Subject 8  | 0.0906186   | 0.0362499         | 0.0201563  | 0.0450308        | -0.257795         | -0.004041       |

317 Table 1.  $bE$  of 8 subjects.  $bE$  is computed from equidistant time segments of acquired SMS encompassing about 15 hours of data  
318 acquisition.

| Behavioral Entropy/Quantities           | HFV       | Blood Oxygenation | Perfusion  | Skin Temperature | Relative Movement | Steps Frequency |
|-----------------------------------------|-----------|-------------------|------------|------------------|-------------------|-----------------|
| $bE_{(HFV)}$ (Amplitude/Exponent)       | 0.07/ 0.4 |                   |            |                  |                   |                 |
| $bE_{(SO_2)}$ (Amplitude/Exponent)      |           | 0.1/0.1           |            |                  |                   |                 |
| $bE_{(Perfusion)}$ (Amplitude/Exponent) |           |                   | -0.0003/5. |                  |                   |                 |
| $bE_{(Skin Temp)}$ (Amplitude/Exponent) |           |                   |            | -0.2/-0.3        |                   |                 |
| $bE_{(Movement)}$ (Amplitude/Exponent)  |           |                   |            |                  | -0.2/-0.3         |                 |
| $bE_{(SF)}$ (Amplitude/Exponent)        |           |                   |            |                  |                   | -0.2/0.2        |

319 Table 2. The the power law is estimated using 8 subjects. The  $bE$  is computed from SMS encompassing about 15 hours of data acquisition  
 320 per subject.

| Quantities | pGSI      | pSRI      | CSSI    | $bE(HFV)$  | $bE(SF)$   | $bE(S_pO_2)$ | FRI     |
|------------|-----------|-----------|---------|------------|------------|--------------|---------|
| Subject 1  | 1.44898   | 0.118618  | 5.08567 | -0.094372  | -0.214842  | -0.463229    | 5.08567 |
| Subject 2  | 0.0936795 | 0.156836  | 3.65345 | -0.0669521 | -0.203418  | 0.278933     | 13.3114 |
| Subject 3  | 3.90593   | 0.0201643 | 3.83594 | -0.207423  | -0.0567872 | -0.0693975   | 4.49745 |
| Subject 4  | 0.0356675 | 0.224131  | 3.40091 | -0.100361  | -0.596833  | -0.131314    | 4.30004 |
| Subject 5  | 0.485007  | 0.254013  | 4.6757  | -0.308734  | -0.135028  | 0.184398     | 3.46533 |
| Subject 6  | 0.5625    | 0.14543   | 3.95665 | 0.183051   | -0.447905  | 0.113521     | 136.667 |
| Subject 7  | 1.23153   | 0.075056  | 3.1995  | -0.0466192 | -0.0813598 | 0.153274     | 8.24744 |
| Subject 8  | 1.6087    | 0.11549   | 7.32154 | 0.0450308  | -0.36093   | 0.0201563    | 10.5815 |

321 Table 3. The complex stress characterization of 8 subjects. The Fatigue Recovery Index, introduced in Kloucek and von Gunten (2016),  
 322 is abbreviated as FRI.  $bE$  is computed from equidistant two hours time segments of SMS encompassing about 15 hours of healthy  
 323 human data acquisition. Comparing Subjects 4 and 6, we conclude that lower pGSI is accompanied by higher pSRI, and lower tendency  
 324 complexities of HFV, SF and  $S_pO_2$ . The data are corroborated by fatigue recovery in the  $Var(HF) \times H(SF)$  space with the ratio of about  
 325 1 : 30 in favor of the highly trained Subject 4. Also the posteriori indices, CSSIs, are consistent with the two other indicators. Consider  
 326 the subject #4: the lowest predictive exposer to stress, second highest resistance to stress, second lowest posteriori stress level during a  
 327 working day cycle including sleep, second lowest FRI, all the three Behavioral Entropies indicating higher reactivitvness with respect to  
 328 HFV, SF and  $S_pO_2$  Kloucek and von Gunten (2018).

| Quantities        | HFV | Perfusion | Blood Oxygenation | Skin Temperature | Relative Movement | Steps Frequency |
|-------------------|-----|-----------|-------------------|------------------|-------------------|-----------------|
| HFV               | 1   | 0.312616  | -0.40399          | 0.061539         | 0.620625          | 0.591639        |
| Perfusion         |     | 1         | -0.420654         | 0.0780781        | 0.200189          | 0.322364        |
| Blood Oxygenation |     |           | 1                 | 0.00443487       | -0.366836         | -0.414813       |
| Skin Temperature  |     |           |                   | 1                | 0.0546847         | 0.0134603       |
| Relative Movement |     |           |                   |                  | 1                 | 0.859321        |
| Steps Frequency   |     |           |                   |                  |                   | 1               |

330 Table 4. The correlation of the SMS for Subject 1. The correlation was obtained from 894 equidistant time segments of acquired data.

| Quantities        | HFV | Perfusion  | Blood Oxygenation | Skin Temperature | Relative Movement | Steps Frequency |
|-------------------|-----|------------|-------------------|------------------|-------------------|-----------------|
| HFV               | 1   | -0.0144155 | -0.281479         | -0.178694        | 0.445759          | 0.366347        |
| Perfusion         |     | 1          | -0.0231772        | -0.090395        | 0.103687          | 0.0946516       |
| Blood Oxygenation |     |            | 1                 | 0.121536         | -0.275235         | -0.268467       |
| Skin Temperature  |     |            |                   | 1                | -0.337818         | -0.254233       |
| Relative Movement |     |            |                   |                  | 1                 | 0.797544        |
| Steps Frequency   |     |            |                   |                  |                   | 1               |

331 Table 5. The correlation of the SMS for subject 2. The correlation was obtained from 431 equidistant time segments of acquired data.

| Quantities        | HFV | Perfusion  | Blood Oxygenation | Skin Temperature | Relative Movement | Steps Frequency |
|-------------------|-----|------------|-------------------|------------------|-------------------|-----------------|
| HFV               | 1   | -0.0304565 | -0.218817         | 0.101863         | 0.468396          | 0.456581        |
| Perfusion         |     | 1          | -0.0370708        | 0.10752          | 0.123471          | 0.143789        |
| Blood Oxygenation |     |            | 1                 | -0.0848257       | -0.267274         | -0.239368       |
| Skin Temperature  |     |            |                   | 1                | 0.0983426         | 0.0782243       |
| Relative Movement |     |            |                   |                  | 1                 | 0.878678        |
| Steps Frequency   |     |            |                   |                  |                   | 1               |

332

Table 6. The correlation of the SMS for subject 3. The correlation was obtained from 1160 equidistant time segments.

| Quantities        | HFV | Perfusion | Blood Oxygenation | Skin Temperature | Relative Movement | Steps Frequency |
|-------------------|-----|-----------|-------------------|------------------|-------------------|-----------------|
| HFV               | 1   | -0.17864  | 0.251414          | 0.0637194        | 0.625233          | 0.676598        |
| Perfusion         |     | 1         | -0.413867         | 0.0450275        | 0.124743          | 0.0341549       |
| Blood Oxygenation |     |           | 1                 | -0.0803077       | -0.107687         | -0.0287573      |
| Skin Temperature  |     |           |                   | 1                | -0.0155391        | 0.0199515       |
| Relative Movement |     |           |                   |                  | 1                 | 0.863616        |
| Steps Frequency   |     |           |                   |                  |                   | 1               |

333

Table 7. The correlation of the SMS for Subject 4. The correlation was obtained from 374 equidistant time segments.

| Quantities        | HFV | Perfusion | Blood Oxygenation | Skin Temperature | Relative Movement | Steps Frequency |
|-------------------|-----|-----------|-------------------|------------------|-------------------|-----------------|
| HFV               | 1   | -0.25438  | -0.286885         | -0.303626        | 0.699491          | 0.580695        |
| Perfusion         |     | 1         | 0.141447          | 0.422901         | -0.044777         | -0.014162       |
| Blood Oxygenation |     |           | 1                 | 0.102708         | -0.148153         | -0.041951       |
| Skin Temperature  |     |           |                   | 1                | -0.055175         | 0.0165696       |
| Relative Movement |     |           |                   |                  | 1                 | 0.905904        |
| Steps Frequency   |     |           |                   |                  |                   | 1               |

334 Table 8. The correlation of the SMS for subject 5. The correlation was obtained from 1826 equidistant time segments.

| Quantities        | HFV | Perfusion | Blood Oxygenation | Skin Temperature | Relative Movement | Steps Frequency |
|-------------------|-----|-----------|-------------------|------------------|-------------------|-----------------|
| HFV               | 1   | 0.10924   | -0.129858         | 0.0153075        | 0.350668          | 0.267524        |
| Perfusion         |     | 1         | -0.146234         | 0.112445         | 0.229024          | 0.206663        |
| Blood Oxygenation |     |           | 1                 | -0.187969        | -0.311809         | -0.207137       |
| Skin Temperature  |     |           |                   | 1                | -0.0353194        | -0.0188643      |
| Relative Movement |     |           |                   |                  | 1                 | 0.778953        |
| Steps Frequency   |     |           |                   |                  |                   | 1               |

335 Table 9. The correlation of the SMS for subject 6. The correlation was obtained from 642 equidistant time segments.

| Quantities        | HFV | Perfusion | Blood Oxygenation | Skin Temperature | Relative Movement | Steps Frequency |
|-------------------|-----|-----------|-------------------|------------------|-------------------|-----------------|
| HFV               | 1   | 0.167969  | -0.36686          | -0.0750689       | 0.630799          | 0.608615        |
| Perfusion         |     | 1         | -0.253866         | 0.200398         | 0.284085          | 0.311865        |
| Blood Oxygenation |     |           | 1                 | 0.217739         | -0.437872         | -0.389442       |
| Skin Temperature  |     |           |                   | 1                | -0.0674336        | -0.00604729     |
| Relative Movement |     |           |                   |                  | 1                 | 0.93125         |
| Steps Frequency   |     |           |                   |                  |                   | 1               |

336

Table 10. The correlation of the SMS for subject 7. The correlation was obtained from 1658 equidistant time segments.

| Quantities        | HFV | Perfusion  | Blood Oxygenation | Skin Temperature | Relative Movement | Steps Frequency |
|-------------------|-----|------------|-------------------|------------------|-------------------|-----------------|
| HFV               | 1   | -0.0450726 | -0.112492         | -0.107827        | 0.483597          | 0.479533        |
| Perfusion         |     | 1          | -0.107982         | -0.0231544       | -0.0138105        | -0.0816         |
| Blood Oxygenation |     |            | 1                 | 0.130734         | -0.236126         | -0.170944       |
| Skin Temperature  |     |            |                   | 1                | -0.0825037        | -0.032942       |
| Relative Movement |     |            |                   |                  | 1                 | 0.901963        |
| Steps Frequency   |     |            |                   |                  |                   | 1               |

337

Table 11. The correlation of the SMS for subject 8. The correlation was obtained from 452 equidistant time segments.



| Quantities        | Segment 1  | Segment 2  | Segment 3 | Segment 4  | Segment 5  | Segment 6  | Segment 7 | Segment 8  |
|-------------------|------------|------------|-----------|------------|------------|------------|-----------|------------|
| HFV               | 22.3652    | 37.8688    | 43.3020   | 70.4190    | 66.9771    | 20.2466    | 27.4566   | 27.9333    |
| Perfusion         | 0.00210023 | 0.00303487 | 0.0142073 | 0.00308452 | 0.00448286 | 0.00580235 | 0.0437197 | 0.00561481 |
| Blood Oxygenation | 16.4855    | 44.9826    | 34.3267   | 12.5918    | 12.6589    | 19.9398    | 7.82296   | 4.68279    |
| Skin Temperature  | 0.915423   | 0.0705794  | 0.018323  | 0.0235593  | 0.0229517  | 0.0999276  | 0.377792  | 0.27331    |
| Relative Movement | 0.522469   | 0.51333    | 1.06422   | 3.57759    | 1.56432    | 0.498561   | 0.156739  | 0.0188911  |
| Steps Frequency   | 54.9058    | 30.7965    | 102.836   | 613.618    | 333.916    | 22.4165    | 3.5368    | 0.00266509 |

339 Table 12. The variance of the SMS for Subject 4. The variance was obtained from 374 equidistant time segments of acquired data.

| Quantities        | Segment 1 | Segment 2 | Segment 3  | Segment 4  | Segment 5 | Segment 6  | Segment 7  | Segment 8 |
|-------------------|-----------|-----------|------------|------------|-----------|------------|------------|-----------|
| HFV               | 339.983   | 101.478   | 118.456    | 146.107    | 522.311   | 34.4726    | 19.3977    | 13.9784   |
| Perfusion         | 0.0543121 | 0.0315185 | 0.00918733 | 0.00217061 | 0.0114509 | 0.00109113 | 0.00178169 | 0.0134619 |
| Blood Oxygenation | 66.8304   | 68.556    | 16.1578    | 13.3593    | 12.07     | 2.83156    | 3.41918    | 8.13148   |
| Skin Temperature  | 0.425757  | 0.44536   | 0.488427   | 0.197185   | 2.53583   | 0.2535     | 0.350932   | 0.0978087 |
| Relative Movement | 4.34773   | 0.263877  | 3.22692    | 2.39485    | 5.16624   | 0.251206   | 0.31262    | 0.712321  |
| Steps Frequency   | 447.909   | 20.6665   | 356.858    | 216.062    | 772.406   | 4.34818    | 10.0686    | 22.1422   |

340 Table 13. The variance of the SMS for Subject 6. The variance was obtained from 642 equidistant time segments of acquired data

341 encompassing about 15 hours of data acquisition.

## DECLARATIONS

### 342 *Authors' Contributions*

343 Both authors contributed equally to the presented research.

### 344 *Competing Interests*

345 Both authors declare that they do not have competing interests.

### 346 *Funding*

347 The presented research was done without any sort of funding.

### 348 *Ethics*

349 The investigation was carried under ethics application “Indexation mathématique de mesures  
350 physiologiques multiples non-invasives en milieu réel chez des sujets sains”, CHUV, Lausanne  
351 Switzerland.

352 In addition each subject signed “Informed Consent” prior to measurements of the data.

353 The collection and handling of data has been carried out in accordance to EU current regulations,  
354 GDPR.

## REFERENCES

355 William M. Bolstad. Understanding computational Bayesian statistics. Wiley series in computational statistics.

356 Wiley, Hoboken, N.J., 2010. ISBN 9780470046098 (cloth) 0470046090 (cloth).

357 Gayle Cain. Artificial neural networks : new research. Computer science, technology and applications. Nova

358 Publishers, New York, 2017. ISBN 9781634859646.

359 T. Caliński and J. Harabasz. A dendrite method for cluster analysis. Communications in Statistics, 3(1):1–27, 1974.

360 C. D. Cantrell. Modern mathematical methods for physicists and engineers. Cambridge University Press,

361 Cambridge, UK ; New York, 2000. ISBN 0521591805 (hb) 0521598273 (pbk.).

- 362 S. Chien. Shear dependence of effective cell volume as a determinant of blood viscosity. *Science*, 168(3934):977–9,  
363 1970.
- 364 Bernard van Cutsem. *Classification and dissimilarity analysis*. Lecture notes in statistics. Springer-Verlag, New  
365 York, 1994. ISBN 0387944001.
- 366 Brian Everitt. *Multivariable modeling and multivariate analysis for the behavioral sciences*. Statistics in the social  
367 and behavioral sciences series. CRC Press, Boca Raton, 1st edition, 2009. ISBN 9781439807699 (alk. paper)  
368 1439807698 (alk. paper).
- 369 D. A Field. Laplacian smoothing and Delaunay triangulations. *Comm. Appl. Num. Methods*, 4:709–712, 1988.
- 370 Michael Greenacre. Ordination with any dissimilarity measure: a weighted euclidean solution. *Ecology*, 98(9):  
371 2293–2300, 2017. ISSN 1939-9170.
- 372 Frank E. Harrell. *Regression modeling strategies : with applications to linear models, logistic regression, and*  
373 *survival analysis*. Springer series in statistics. Springer, New York, 2001. ISBN 0387952322 (alk. paper).
- 374 David W. Hosmer, Stanley Lemeshow, and Rodney X. Sturdivant. *Applied logistic regression*. Wiley series in  
375 probability and statistics. Wiley, Hoboken, New Jersey, third edition edition, 2013. ISBN 9780470582473  
376 (hardback).
- 377 David C. Howell. *Statistical methods for psychology*. Wadsworth Cengage Learning, Belmont, CA, 8th edition,  
378 2013. ISBN 9781111835484 (hbk.) 1111835489 (hbk.).
- 379 P. Kloucek and A. von Gunten. On the possibility of identifying human subjects using behavioural complexity  
380 analyses. *Quantitative Biology*, 4(4):261–269, Dec 2016. ISSN 2095-4697.
- 381 P. Kloucek and A. von Gunten. The compound spectral indices of human stress. *J. Appl. Math*, 9(12):1378–1394,  
382 2018.
- 383 P. Kloucek, P. Zakharov, and A. von Gunten. The compound indexing of human self-similar behavioural patterns.  
384 *J. Applied Mathematics*, 7:2212–2228, 2016.
- 385 Charles J. Krebs. *Ecological methodology*. Benjamin/Cummings, Menlo Park, Calif., 2nd edition, 1999. ISBN  
386 0321021738.
- 387 Rudolf Kruse. *Computational intelligence : a methodological introduction*. Texts in computer science. Springer,  
388 New York, 1st edition, 2013. ISBN 9781447150121 (hard cover alk. paper).
- 389 D. T Lee and B. J Schachter. Two algorithms for construting a Delaunay triangulation. *Int. J. Computer Inf. Sci*,  
390 9:219–242, 1980.

- 391 David J. C. MacKay. Information theory, inference, and learning algorithms. Cambridge University Press,  
392 Cambridge, UK ; New York, 2003. ISBN 0521642981.
- 393 B. Mandelbrot and J. Van Ness. Fractional brownian motions, fractional noises and applications. *SIAM Review*, 10  
394 (4):422–437, 1968.
- 395 P. Mörters and Y. Peres. Brownian motion. Cambridge Series in Statistical and Probabilistic Mathematics.  
396 Cambridge University Press, Cambridge, 2010.
- 397 M. Nikinmaa. Membrane transport and control of hemoglobin-oxygen affinity in nucleated erythrocytes. *Physiol*  
398 *Rev*, 72(2):301–21, 1992.
- 399 M. Nikinmaa and F. B. Jensen. Inhibition of adrenergic proton extrusion in rainbow trout red cells by  
400 nitrite-induced methaemoglobinaemia. *J Comp Physiol B*, 162(5):424–9, 1992.
- 401 M. Nikinmaa and L. Mattsoff. Effects of oxygen saturation on the  $CO_2$  transport properties of lampetra red cells.  
402 *Respir Physiol*, 87(2):219–30, 1992.
- 403 K. Pearson. Notes on regression and inheritance in the case of two parents. *Proceedings of the Royal Society of*  
404 *London*, 58:240–242, 1895.
- 405 H-O. Peitgen, H. Jüngen, and D. Saupe. *Chaos and Fractals*. Springer-Verlag, New York, 1992.
- 406 A. F. Riggs. The bohr effect. *Annu Rev Physiol*, 50:181–204, 1988. ISSN 0066-4278 (Print) 0066-4278 (Linking).
- 407 Brian D. Ripley. *Pattern recognition and neural networks*. Cambridge University Press, Cambridge ; New York,  
408 1996. ISBN 0521460867 (hardback).
- 409 Richard J. Rossi. *Applied biostatistics for the health sciences*. John Wiley and Sons, Hoboken, N.J., 2010. ISBN  
410 9780470147641 (cloth) 0470147644 (cloth).
- 411 Robert J. Schalkoff. *Artificial neural networks*. McGraw-Hill series in computer science Artificial intelligence.  
412 McGraw-Hill, New York, 1997. ISBN 007057118X.
- 413 E. Schrödinger. *What is life?* Cambridge University Press, 1944.
- 414 G. K. Snyder and W. W. Weathers. Hematology, viscosity, and respiratory functions of whole blood of the lesser  
415 mouse deer, *tragulus javanicus*. *J Appl Physiol Respir Environ Exerc Physiol*, 42(5):673–8, 1977.
